# Supplementary material for: A multi-omic Nicotiana benthamiana resource for fundamental research and biotechnology
Source: PubMed Central journal article supplement (PMC10505560; doi:10.1038/s41477-023-01489-8), 2023-08-10
Supplement: 41477_2023_1489_MOESM2_ESM.pdf [file 41477_2023_1489_MOESM2_ESM.pdf]

## Reporting Summary

Nature Portfolio wishes to improve the reproducibility of the work that we publish. This form provides structure for consistency and transparency in reporting. For further information on Nature Portfolio policies, see our [Editorial Policies](#) and the [Editorial Policy Checklist](#).

### Statistics

For all statistical analyses, confirm that the following items are present in the figure legend, table legend, main text, or Methods section.

n/a Confirmed

- The exact sample size ( $n$ ) for each experimental group/condition, given as a discrete number and unit of measurement
- A statement on whether measurements were taken from distinct samples or whether the same sample was measured repeatedly
- The statistical test(s) used AND whether they are one- or two-sided  
*Only common tests should be described solely by name; describe more complex techniques in the Methods section.*
- A description of all covariates tested
- A description of any assumptions or corrections, such as tests of normality and adjustment for multiple comparisons
- A full description of the statistical parameters including central tendency (e.g. means) or other basic estimates (e.g. regression coefficient) AND variation (e.g. standard deviation) or associated estimates of uncertainty (e.g. confidence intervals)
- For null hypothesis testing, the test statistic (e.g.  $F$ ,  $t$ ,  $r$ ) with confidence intervals, effect sizes, degrees of freedom and  $P$  value noted  
*Give  $P$  values as exact values whenever suitable.*
- For Bayesian analysis, information on the choice of priors and Markov chain Monte Carlo settings
- For hierarchical and complex designs, identification of the appropriate level for tests and full reporting of outcomes
- Estimates of effect sizes (e.g. Cohen's  $d$ , Pearson's  $r$ ), indicating how they were calculated

*Our web collection on [statistics for biologists](#) contains articles on many of the points above.*

### Software and code

Policy information about [availability of computer code](#)

Data collection

Data analysis

For manuscripts utilizing custom algorithms or software that are central to the research but not yet described in published literature, software must be made available to editors and reviewers. We strongly encourage code deposition in a community repository (e.g. GitHub). See the Nature Portfolio [guidelines for submitting code & software](#) for further information.

## Data

Policy information about [availability of data](#)

All manuscripts must include a [data availability statement](#). This statement should provide the following information, where applicable:

- Accession codes, unique identifiers, or web links for publicly available datasets
- A description of any restrictions on data availability
- For clinical datasets or third party data, please ensure that the statement adheres to our [policy](#)

The *Nicotiana benthamiana* genome and transcriptome assemblies, along with their annotations, can be accessed at <https://apollo.nbent.com/>. The raw data utilized for genome assembly has been deposited in the NCBI Sequence Read Archive (SRA) under BioProject PRJNA881799. Specifically, the PacBio data for LAB and QLD can be found under the accessions SRR21820240 and SRR21820239, respectively. The HiC data for LAB and QLD are available under the accessions SRR21820238 and SRR21820237, respectively.

Databases used: KEGG (<https://www.genome.jp/kegg/compound/>), Metfrag (<https://ipb-halle.github.io/MetFrag/projects/metfragweb/>), PubChem mass databases (ST3) (<https://pubchem.ncbi.nlm.nih.gov/>), miRbase (release 21; <https://www.mirbase.org/>) and *Nicotiana attenuata* Data Hub (<http://nadh.ice.mpg.de/NaDH/others/data>)

## Human research participants

Policy information about [studies involving human research participants and Sex and Gender in Research](#).

Reporting on sex and gender

N/A

Population characteristics

N/A

Recruitment

N/A

Ethics oversight

N/A

Note that full information on the approval of the study protocol must also be provided in the manuscript.

## Field-specific reporting

Please select the one below that is the best fit for your research. If you are not sure, read the appropriate sections before making your selection.

Life sciences  Behavioural & social sciences  Ecological, evolutionary & environmental sciences

For a reference copy of the document with all sections, see [nature.com/documents/nr-reporting-summary-flat.pdf](https://nature.com/documents/nr-reporting-summary-flat.pdf)

## Life sciences study design

All studies must disclose on these points even when the disclosure is negative.

Sample size

No sample size calculation was performed. Sample sizes were determined according to similar studies in the field. This approach ensured that the selected sample sizes would enable confident statistical analysis while considering factors such as the cost of analysis and the sample availability.

Data exclusions

No data were excluded.

Replication

All experiments using multiple samples (eg transgene expression levels, described in extended data) had at least 3 biological replicates and 2 technical replicates. In most experiments, considerably more replicates were used and the n values are reported in the text and figures.

Randomization

For most of the experiments conducted, randomization was not necessary. However, for specific experiments such as the comparison of plant transformation and editing efficiency, RNAseq and metabolomics, ChIP-seq, whole genome bisulfite sequencing as well as transgene insertion experiments, randomization of plants was implemented in both the tissue culture and growth rooms to mitigate the impact of confounding variables and increases the validity and reliability of the experimental results.

Blinding

Since this paper primarily focuses on the assembly and analysis of the *N. benthamiana* genome, blinding was not applicable to this study due to the nature of the experimental design and the specific procedures involved. These processes are computational and technical in nature, involving the application of specialized algorithms, bioinformatics tools, and statistical analyses. The material used for biological experiments; plant transformation and editing efficiency, RNAseq and metabolomics, ChIP-seq, whole

## Reporting for specific materials, systems and methods

We require information from authors about some types of materials, experimental systems and methods used in many studies. Here, indicate whether each material, system or method listed is relevant to your study. If you are not sure if a list item applies to your research, read the appropriate section before selecting a response.

### Materials & experimental systems

### Methods

- n/a | Involved in the study
- Antibodies
  - Eukaryotic cell lines
  - Palaeontology and archaeology
  - Animals and other organisms
  - Clinical data
  - Dual use research of concern

- n/a | Involved in the study
- ChIP-seq
  - Flow cytometry
  - MRI-based neuroimaging

## Antibodies

### Antibodies used

Antibodies:  
 Manufacturer: Abcam  
 Catalog/lot number: Anti-Histone H3 (tri methyl K4) antibody - ChIP Grade (ab8580)  
 Used at a 1:100 dilution.

Manufacturer: Abcam  
 Catalog/lot number: Anti-Histone H3 (tri methyl K27) antibody - ChIP Grade (Abcam ab6002)  
 Used at a 1:100 dilution.

Manufacturer: Abcam  
 Catalog/lot number: Anti-Histone H3 (acetyl K27) antibody - ChIP Grade (ab4729)  
 Used at a 1:100 dilution.

Manufacturer: Diagenode  
 Catalog/lot number: H3K9me2 polyclonal antibody-Classic (Diagenode C15410060)  
 Used at a 1:100 dilution.

### Validation

Anti-Histone H3 (tri methyl K4) antibody - ChIP Grade (ab8580) validated by manufacturer Abcam (Manufacturer's information available at <https://www.abcam.com/products/primary-antibodies/histone-h3-tri-methyl-k4-antibody-chip-grade-ab8580.html?productWallTab=ShowAll>)

Anti-Histone H3 (tri methyl K27) antibody - ChIP Grade (Abcam ab6002) validated by manufacturer Abcam (Manufacturer's information available at <https://www.abcam.com/products/primary-antibodies/histone-h3-tri-methyl-k27-antibody-mabcam-6002-chip-grade-ab6002.html?productWallTab=ShowAll>)

Anti-Histone H3 (acetyl K27) antibody - ChIP Grade (ab4729) validated by manufacturer Abcam (Manufacturer's information available at <https://www.abcam.com/products/primary-antibodies/histone-h3-acetyl-k27-antibody-chip-grade-ab4729.html>)

H3K9me2 polyclonal antibody-Classic (Diagenode C15410060) validated by manufacturer Diagenode (Manufacturer's information available at <https://www.diagenode.com/en/p/h3k9me2-polyclonal-antibody-classic-50-ug-44-ul#>)

## ChIP-seq

### Data deposition

- Confirm that both raw and final processed data have been deposited in a public database such as [GEO](#).
- Confirm that you have deposited or provided access to graph files (e.g. BED files) for the called peaks.

### Data access links

May remain private before publication.

Web Apollo platform <https://www.nbenth.com/>  
 LAB v3.6 and QLD v 1.83  
 BioProject PRJNA881799. <http://www.ncbi.nlm.nih.gov/bioproject/881799>

Files in database submission Files available from BioProject ID: PRJNA881799 <http://www.ncbi.nlm.nih.gov/bioproject/881799>Genome browser session (e.g. UCSC) Web Apollo platform <https://www.nbenth.com/>

## Methodology

| Replicates              | The genome-wide histone modification landscapes of LAB and QLD. Libraries were determined using two replicates per histone modification and control input                                                                                                                                                                                                                                                                                                                                                                                                                                                                                                                                                                                                                                                                                                                                                                                                                                                                                                                                                                                                                                                                                                                                                                                                                                                                                                                                                                                                                                                                                                                                                                                                                                                                                                                                                                                                                                                                                             |                                 |                                |                                 |             |            |            |             |             |            |             |             |            |             |             |            |              |             |            |              |            |            |             |            |            |             |             |             |          |             |            |          |             |            |          |             |             |          |             |             |             |             |            |             |            |            |             |            |            |             |            |            |              |            |            |              |             |            |             |             |             |             |            |            |          |             |            |          |             |            |          |             |             |          |             |             |
|-------------------------|-------------------------------------------------------------------------------------------------------------------------------------------------------------------------------------------------------------------------------------------------------------------------------------------------------------------------------------------------------------------------------------------------------------------------------------------------------------------------------------------------------------------------------------------------------------------------------------------------------------------------------------------------------------------------------------------------------------------------------------------------------------------------------------------------------------------------------------------------------------------------------------------------------------------------------------------------------------------------------------------------------------------------------------------------------------------------------------------------------------------------------------------------------------------------------------------------------------------------------------------------------------------------------------------------------------------------------------------------------------------------------------------------------------------------------------------------------------------------------------------------------------------------------------------------------------------------------------------------------------------------------------------------------------------------------------------------------------------------------------------------------------------------------------------------------------------------------------------------------------------------------------------------------------------------------------------------------------------------------------------------------------------------------------------------------|---------------------------------|--------------------------------|---------------------------------|-------------|------------|------------|-------------|-------------|------------|-------------|-------------|------------|-------------|-------------|------------|--------------|-------------|------------|--------------|------------|------------|-------------|------------|------------|-------------|-------------|-------------|----------|-------------|------------|----------|-------------|------------|----------|-------------|-------------|----------|-------------|-------------|-------------|-------------|------------|-------------|------------|------------|-------------|------------|------------|-------------|------------|------------|--------------|------------|------------|--------------|-------------|------------|-------------|-------------|-------------|-------------|------------|------------|----------|-------------|------------|----------|-------------|------------|----------|-------------|-------------|----------|-------------|-------------|
| Sequencing depth        | <table border="1"> <thead> <tr> <th>Sample</th> <th>Number of total Reads (paired)</th> <th>Number of mapped reads (paired)</th> </tr> </thead> <tbody> <tr><td>L_H3K27acR1</td><td>87,766,459</td><td>72,187,913</td></tr> <tr><td>L_H3K27acR2</td><td>111,137,613</td><td>86,887,386</td></tr> <tr><td>L_H3K4me3R1</td><td>101,420,324</td><td>80,740,720</td></tr> <tr><td>L_H3K4me3R2</td><td>103,062,025</td><td>87,231,698</td></tr> <tr><td>L_H3K27me3R1</td><td>101,644,913</td><td>49,226,631</td></tr> <tr><td>L_H3K27me3R2</td><td>87,125,829</td><td>71,617,431</td></tr> <tr><td>L_H3K9me2R1</td><td>32,710,161</td><td>31,143,344</td></tr> <tr><td>L_H3K9me2R2</td><td>349,788,182</td><td>299,442,004</td></tr> <tr><td>L_Input1</td><td>121,539,580</td><td>72,680,669</td></tr> <tr><td>L_Input2</td><td>120,448,239</td><td>60,356,613</td></tr> <tr><td>L_Input3</td><td>174,002,911</td><td>129,771,371</td></tr> <tr><td>L_Input4</td><td>121,031,125</td><td>119,748,195</td></tr> <tr><td>Q_H3K27acR1</td><td>106,529,454</td><td>86,214,287</td></tr> <tr><td>Q_H3K27acR2</td><td>91,504,824</td><td>75,226,116</td></tr> <tr><td>Q_H3K4me3R1</td><td>98,117,437</td><td>68,947,123</td></tr> <tr><td>Q_H3K4me3R2</td><td>87,068,856</td><td>67,800,518</td></tr> <tr><td>Q_H3K27me3R1</td><td>97,125,964</td><td>39,287,452</td></tr> <tr><td>Q_H3K27me3R2</td><td>117,728,178</td><td>79,254,609</td></tr> <tr><td>Q_H3K9me2R1</td><td>235,913,497</td><td>211,755,955</td></tr> <tr><td>Q_H3K9me2R2</td><td>27,665,306</td><td>25,900,259</td></tr> <tr><td>Q_Input1</td><td>124,174,832</td><td>64,099,048</td></tr> <tr><td>Q_Input2</td><td>106,428,021</td><td>60,483,044</td></tr> <tr><td>Q_Input3</td><td>107,547,910</td><td>101,417,679</td></tr> <tr><td>Q_Input4</td><td>125,052,817</td><td>118,062,365</td></tr> </tbody> </table> <p>Alignments with MAPQ of &lt; 40 were discarded prior to downstream analyses to ensure homeolog specificity and accuracy in polyploid <i>N. benthamiana</i> genome.</p> | Sample                          | Number of total Reads (paired) | Number of mapped reads (paired) | L_H3K27acR1 | 87,766,459 | 72,187,913 | L_H3K27acR2 | 111,137,613 | 86,887,386 | L_H3K4me3R1 | 101,420,324 | 80,740,720 | L_H3K4me3R2 | 103,062,025 | 87,231,698 | L_H3K27me3R1 | 101,644,913 | 49,226,631 | L_H3K27me3R2 | 87,125,829 | 71,617,431 | L_H3K9me2R1 | 32,710,161 | 31,143,344 | L_H3K9me2R2 | 349,788,182 | 299,442,004 | L_Input1 | 121,539,580 | 72,680,669 | L_Input2 | 120,448,239 | 60,356,613 | L_Input3 | 174,002,911 | 129,771,371 | L_Input4 | 121,031,125 | 119,748,195 | Q_H3K27acR1 | 106,529,454 | 86,214,287 | Q_H3K27acR2 | 91,504,824 | 75,226,116 | Q_H3K4me3R1 | 98,117,437 | 68,947,123 | Q_H3K4me3R2 | 87,068,856 | 67,800,518 | Q_H3K27me3R1 | 97,125,964 | 39,287,452 | Q_H3K27me3R2 | 117,728,178 | 79,254,609 | Q_H3K9me2R1 | 235,913,497 | 211,755,955 | Q_H3K9me2R2 | 27,665,306 | 25,900,259 | Q_Input1 | 124,174,832 | 64,099,048 | Q_Input2 | 106,428,021 | 60,483,044 | Q_Input3 | 107,547,910 | 101,417,679 | Q_Input4 | 125,052,817 | 118,062,365 |
| Sample                  | Number of total Reads (paired)                                                                                                                                                                                                                                                                                                                                                                                                                                                                                                                                                                                                                                                                                                                                                                                                                                                                                                                                                                                                                                                                                                                                                                                                                                                                                                                                                                                                                                                                                                                                                                                                                                                                                                                                                                                                                                                                                                                                                                                                                        | Number of mapped reads (paired) |                                |                                 |             |            |            |             |             |            |             |             |            |             |             |            |              |             |            |              |            |            |             |            |            |             |             |             |          |             |            |          |             |            |          |             |             |          |             |             |             |             |            |             |            |            |             |            |            |             |            |            |              |            |            |              |             |            |             |             |             |             |            |            |          |             |            |          |             |            |          |             |             |          |             |             |
| L_H3K27acR1             | 87,766,459                                                                                                                                                                                                                                                                                                                                                                                                                                                                                                                                                                                                                                                                                                                                                                                                                                                                                                                                                                                                                                                                                                                                                                                                                                                                                                                                                                                                                                                                                                                                                                                                                                                                                                                                                                                                                                                                                                                                                                                                                                            | 72,187,913                      |                                |                                 |             |            |            |             |             |            |             |             |            |             |             |            |              |             |            |              |            |            |             |            |            |             |             |             |          |             |            |          |             |            |          |             |             |          |             |             |             |             |            |             |            |            |             |            |            |             |            |            |              |            |            |              |             |            |             |             |             |             |            |            |          |             |            |          |             |            |          |             |             |          |             |             |
| L_H3K27acR2             | 111,137,613                                                                                                                                                                                                                                                                                                                                                                                                                                                                                                                                                                                                                                                                                                                                                                                                                                                                                                                                                                                                                                                                                                                                                                                                                                                                                                                                                                                                                                                                                                                                                                                                                                                                                                                                                                                                                                                                                                                                                                                                                                           | 86,887,386                      |                                |                                 |             |            |            |             |             |            |             |             |            |             |             |            |              |             |            |              |            |            |             |            |            |             |             |             |          |             |            |          |             |            |          |             |             |          |             |             |             |             |            |             |            |            |             |            |            |             |            |            |              |            |            |              |             |            |             |             |             |             |            |            |          |             |            |          |             |            |          |             |             |          |             |             |
| L_H3K4me3R1             | 101,420,324                                                                                                                                                                                                                                                                                                                                                                                                                                                                                                                                                                                                                                                                                                                                                                                                                                                                                                                                                                                                                                                                                                                                                                                                                                                                                                                                                                                                                                                                                                                                                                                                                                                                                                                                                                                                                                                                                                                                                                                                                                           | 80,740,720                      |                                |                                 |             |            |            |             |             |            |             |             |            |             |             |            |              |             |            |              |            |            |             |            |            |             |             |             |          |             |            |          |             |            |          |             |             |          |             |             |             |             |            |             |            |            |             |            |            |             |            |            |              |            |            |              |             |            |             |             |             |             |            |            |          |             |            |          |             |            |          |             |             |          |             |             |
| L_H3K4me3R2             | 103,062,025                                                                                                                                                                                                                                                                                                                                                                                                                                                                                                                                                                                                                                                                                                                                                                                                                                                                                                                                                                                                                                                                                                                                                                                                                                                                                                                                                                                                                                                                                                                                                                                                                                                                                                                                                                                                                                                                                                                                                                                                                                           | 87,231,698                      |                                |                                 |             |            |            |             |             |            |             |             |            |             |             |            |              |             |            |              |            |            |             |            |            |             |             |             |          |             |            |          |             |            |          |             |             |          |             |             |             |             |            |             |            |            |             |            |            |             |            |            |              |            |            |              |             |            |             |             |             |             |            |            |          |             |            |          |             |            |          |             |             |          |             |             |
| L_H3K27me3R1            | 101,644,913                                                                                                                                                                                                                                                                                                                                                                                                                                                                                                                                                                                                                                                                                                                                                                                                                                                                                                                                                                                                                                                                                                                                                                                                                                                                                                                                                                                                                                                                                                                                                                                                                                                                                                                                                                                                                                                                                                                                                                                                                                           | 49,226,631                      |                                |                                 |             |            |            |             |             |            |             |             |            |             |             |            |              |             |            |              |            |            |             |            |            |             |             |             |          |             |            |          |             |            |          |             |             |          |             |             |             |             |            |             |            |            |             |            |            |             |            |            |              |            |            |              |             |            |             |             |             |             |            |            |          |             |            |          |             |            |          |             |             |          |             |             |
| L_H3K27me3R2            | 87,125,829                                                                                                                                                                                                                                                                                                                                                                                                                                                                                                                                                                                                                                                                                                                                                                                                                                                                                                                                                                                                                                                                                                                                                                                                                                                                                                                                                                                                                                                                                                                                                                                                                                                                                                                                                                                                                                                                                                                                                                                                                                            | 71,617,431                      |                                |                                 |             |            |            |             |             |            |             |             |            |             |             |            |              |             |            |              |            |            |             |            |            |             |             |             |          |             |            |          |             |            |          |             |             |          |             |             |             |             |            |             |            |            |             |            |            |             |            |            |              |            |            |              |             |            |             |             |             |             |            |            |          |             |            |          |             |            |          |             |             |          |             |             |
| L_H3K9me2R1             | 32,710,161                                                                                                                                                                                                                                                                                                                                                                                                                                                                                                                                                                                                                                                                                                                                                                                                                                                                                                                                                                                                                                                                                                                                                                                                                                                                                                                                                                                                                                                                                                                                                                                                                                                                                                                                                                                                                                                                                                                                                                                                                                            | 31,143,344                      |                                |                                 |             |            |            |             |             |            |             |             |            |             |             |            |              |             |            |              |            |            |             |            |            |             |             |             |          |             |            |          |             |            |          |             |             |          |             |             |             |             |            |             |            |            |             |            |            |             |            |            |              |            |            |              |             |            |             |             |             |             |            |            |          |             |            |          |             |            |          |             |             |          |             |             |
| L_H3K9me2R2             | 349,788,182                                                                                                                                                                                                                                                                                                                                                                                                                                                                                                                                                                                                                                                                                                                                                                                                                                                                                                                                                                                                                                                                                                                                                                                                                                                                                                                                                                                                                                                                                                                                                                                                                                                                                                                                                                                                                                                                                                                                                                                                                                           | 299,442,004                     |                                |                                 |             |            |            |             |             |            |             |             |            |             |             |            |              |             |            |              |            |            |             |            |            |             |             |             |          |             |            |          |             |            |          |             |             |          |             |             |             |             |            |             |            |            |             |            |            |             |            |            |              |            |            |              |             |            |             |             |             |             |            |            |          |             |            |          |             |            |          |             |             |          |             |             |
| L_Input1                | 121,539,580                                                                                                                                                                                                                                                                                                                                                                                                                                                                                                                                                                                                                                                                                                                                                                                                                                                                                                                                                                                                                                                                                                                                                                                                                                                                                                                                                                                                                                                                                                                                                                                                                                                                                                                                                                                                                                                                                                                                                                                                                                           | 72,680,669                      |                                |                                 |             |            |            |             |             |            |             |             |            |             |             |            |              |             |            |              |            |            |             |            |            |             |             |             |          |             |            |          |             |            |          |             |             |          |             |             |             |             |            |             |            |            |             |            |            |             |            |            |              |            |            |              |             |            |             |             |             |             |            |            |          |             |            |          |             |            |          |             |             |          |             |             |
| L_Input2                | 120,448,239                                                                                                                                                                                                                                                                                                                                                                                                                                                                                                                                                                                                                                                                                                                                                                                                                                                                                                                                                                                                                                                                                                                                                                                                                                                                                                                                                                                                                                                                                                                                                                                                                                                                                                                                                                                                                                                                                                                                                                                                                                           | 60,356,613                      |                                |                                 |             |            |            |             |             |            |             |             |            |             |             |            |              |             |            |              |            |            |             |            |            |             |             |             |          |             |            |          |             |            |          |             |             |          |             |             |             |             |            |             |            |            |             |            |            |             |            |            |              |            |            |              |             |            |             |             |             |             |            |            |          |             |            |          |             |            |          |             |             |          |             |             |
| L_Input3                | 174,002,911                                                                                                                                                                                                                                                                                                                                                                                                                                                                                                                                                                                                                                                                                                                                                                                                                                                                                                                                                                                                                                                                                                                                                                                                                                                                                                                                                                                                                                                                                                                                                                                                                                                                                                                                                                                                                                                                                                                                                                                                                                           | 129,771,371                     |                                |                                 |             |            |            |             |             |            |             |             |            |             |             |            |              |             |            |              |            |            |             |            |            |             |             |             |          |             |            |          |             |            |          |             |             |          |             |             |             |             |            |             |            |            |             |            |            |             |            |            |              |            |            |              |             |            |             |             |             |             |            |            |          |             |            |          |             |            |          |             |             |          |             |             |
| L_Input4                | 121,031,125                                                                                                                                                                                                                                                                                                                                                                                                                                                                                                                                                                                                                                                                                                                                                                                                                                                                                                                                                                                                                                                                                                                                                                                                                                                                                                                                                                                                                                                                                                                                                                                                                                                                                                                                                                                                                                                                                                                                                                                                                                           | 119,748,195                     |                                |                                 |             |            |            |             |             |            |             |             |            |             |             |            |              |             |            |              |            |            |             |            |            |             |             |             |          |             |            |          |             |            |          |             |             |          |             |             |             |             |            |             |            |            |             |            |            |             |            |            |              |            |            |              |             |            |             |             |             |             |            |            |          |             |            |          |             |            |          |             |             |          |             |             |
| Q_H3K27acR1             | 106,529,454                                                                                                                                                                                                                                                                                                                                                                                                                                                                                                                                                                                                                                                                                                                                                                                                                                                                                                                                                                                                                                                                                                                                                                                                                                                                                                                                                                                                                                                                                                                                                                                                                                                                                                                                                                                                                                                                                                                                                                                                                                           | 86,214,287                      |                                |                                 |             |            |            |             |             |            |             |             |            |             |             |            |              |             |            |              |            |            |             |            |            |             |             |             |          |             |            |          |             |            |          |             |             |          |             |             |             |             |            |             |            |            |             |            |            |             |            |            |              |            |            |              |             |            |             |             |             |             |            |            |          |             |            |          |             |            |          |             |             |          |             |             |
| Q_H3K27acR2             | 91,504,824                                                                                                                                                                                                                                                                                                                                                                                                                                                                                                                                                                                                                                                                                                                                                                                                                                                                                                                                                                                                                                                                                                                                                                                                                                                                                                                                                                                                                                                                                                                                                                                                                                                                                                                                                                                                                                                                                                                                                                                                                                            | 75,226,116                      |                                |                                 |             |            |            |             |             |            |             |             |            |             |             |            |              |             |            |              |            |            |             |            |            |             |             |             |          |             |            |          |             |            |          |             |             |          |             |             |             |             |            |             |            |            |             |            |            |             |            |            |              |            |            |              |             |            |             |             |             |             |            |            |          |             |            |          |             |            |          |             |             |          |             |             |
| Q_H3K4me3R1             | 98,117,437                                                                                                                                                                                                                                                                                                                                                                                                                                                                                                                                                                                                                                                                                                                                                                                                                                                                                                                                                                                                                                                                                                                                                                                                                                                                                                                                                                                                                                                                                                                                                                                                                                                                                                                                                                                                                                                                                                                                                                                                                                            | 68,947,123                      |                                |                                 |             |            |            |             |             |            |             |             |            |             |             |            |              |             |            |              |            |            |             |            |            |             |             |             |          |             |            |          |             |            |          |             |             |          |             |             |             |             |            |             |            |            |             |            |            |             |            |            |              |            |            |              |             |            |             |             |             |             |            |            |          |             |            |          |             |            |          |             |             |          |             |             |
| Q_H3K4me3R2             | 87,068,856                                                                                                                                                                                                                                                                                                                                                                                                                                                                                                                                                                                                                                                                                                                                                                                                                                                                                                                                                                                                                                                                                                                                                                                                                                                                                                                                                                                                                                                                                                                                                                                                                                                                                                                                                                                                                                                                                                                                                                                                                                            | 67,800,518                      |                                |                                 |             |            |            |             |             |            |             |             |            |             |             |            |              |             |            |              |            |            |             |            |            |             |             |             |          |             |            |          |             |            |          |             |             |          |             |             |             |             |            |             |            |            |             |            |            |             |            |            |              |            |            |              |             |            |             |             |             |             |            |            |          |             |            |          |             |            |          |             |             |          |             |             |
| Q_H3K27me3R1            | 97,125,964                                                                                                                                                                                                                                                                                                                                                                                                                                                                                                                                                                                                                                                                                                                                                                                                                                                                                                                                                                                                                                                                                                                                                                                                                                                                                                                                                                                                                                                                                                                                                                                                                                                                                                                                                                                                                                                                                                                                                                                                                                            | 39,287,452                      |                                |                                 |             |            |            |             |             |            |             |             |            |             |             |            |              |             |            |              |            |            |             |            |            |             |             |             |          |             |            |          |             |            |          |             |             |          |             |             |             |             |            |             |            |            |             |            |            |             |            |            |              |            |            |              |             |            |             |             |             |             |            |            |          |             |            |          |             |            |          |             |             |          |             |             |
| Q_H3K27me3R2            | 117,728,178                                                                                                                                                                                                                                                                                                                                                                                                                                                                                                                                                                                                                                                                                                                                                                                                                                                                                                                                                                                                                                                                                                                                                                                                                                                                                                                                                                                                                                                                                                                                                                                                                                                                                                                                                                                                                                                                                                                                                                                                                                           | 79,254,609                      |                                |                                 |             |            |            |             |             |            |             |             |            |             |             |            |              |             |            |              |            |            |             |            |            |             |             |             |          |             |            |          |             |            |          |             |             |          |             |             |             |             |            |             |            |            |             |            |            |             |            |            |              |            |            |              |             |            |             |             |             |             |            |            |          |             |            |          |             |            |          |             |             |          |             |             |
| Q_H3K9me2R1             | 235,913,497                                                                                                                                                                                                                                                                                                                                                                                                                                                                                                                                                                                                                                                                                                                                                                                                                                                                                                                                                                                                                                                                                                                                                                                                                                                                                                                                                                                                                                                                                                                                                                                                                                                                                                                                                                                                                                                                                                                                                                                                                                           | 211,755,955                     |                                |                                 |             |            |            |             |             |            |             |             |            |             |             |            |              |             |            |              |            |            |             |            |            |             |             |             |          |             |            |          |             |            |          |             |             |          |             |             |             |             |            |             |            |            |             |            |            |             |            |            |              |            |            |              |             |            |             |             |             |             |            |            |          |             |            |          |             |            |          |             |             |          |             |             |
| Q_H3K9me2R2             | 27,665,306                                                                                                                                                                                                                                                                                                                                                                                                                                                                                                                                                                                                                                                                                                                                                                                                                                                                                                                                                                                                                                                                                                                                                                                                                                                                                                                                                                                                                                                                                                                                                                                                                                                                                                                                                                                                                                                                                                                                                                                                                                            | 25,900,259                      |                                |                                 |             |            |            |             |             |            |             |             |            |             |             |            |              |             |            |              |            |            |             |            |            |             |             |             |          |             |            |          |             |            |          |             |             |          |             |             |             |             |            |             |            |            |             |            |            |             |            |            |              |            |            |              |             |            |             |             |             |             |            |            |          |             |            |          |             |            |          |             |             |          |             |             |
| Q_Input1                | 124,174,832                                                                                                                                                                                                                                                                                                                                                                                                                                                                                                                                                                                                                                                                                                                                                                                                                                                                                                                                                                                                                                                                                                                                                                                                                                                                                                                                                                                                                                                                                                                                                                                                                                                                                                                                                                                                                                                                                                                                                                                                                                           | 64,099,048                      |                                |                                 |             |            |            |             |             |            |             |             |            |             |             |            |              |             |            |              |            |            |             |            |            |             |             |             |          |             |            |          |             |            |          |             |             |          |             |             |             |             |            |             |            |            |             |            |            |             |            |            |              |            |            |              |             |            |             |             |             |             |            |            |          |             |            |          |             |            |          |             |             |          |             |             |
| Q_Input2                | 106,428,021                                                                                                                                                                                                                                                                                                                                                                                                                                                                                                                                                                                                                                                                                                                                                                                                                                                                                                                                                                                                                                                                                                                                                                                                                                                                                                                                                                                                                                                                                                                                                                                                                                                                                                                                                                                                                                                                                                                                                                                                                                           | 60,483,044                      |                                |                                 |             |            |            |             |             |            |             |             |            |             |             |            |              |             |            |              |            |            |             |            |            |             |             |             |          |             |            |          |             |            |          |             |             |          |             |             |             |             |            |             |            |            |             |            |            |             |            |            |              |            |            |              |             |            |             |             |             |             |            |            |          |             |            |          |             |            |          |             |             |          |             |             |
| Q_Input3                | 107,547,910                                                                                                                                                                                                                                                                                                                                                                                                                                                                                                                                                                                                                                                                                                                                                                                                                                                                                                                                                                                                                                                                                                                                                                                                                                                                                                                                                                                                                                                                                                                                                                                                                                                                                                                                                                                                                                                                                                                                                                                                                                           | 101,417,679                     |                                |                                 |             |            |            |             |             |            |             |             |            |             |             |            |              |             |            |              |            |            |             |            |            |             |             |             |          |             |            |          |             |            |          |             |             |          |             |             |             |             |            |             |            |            |             |            |            |             |            |            |              |            |            |              |             |            |             |             |             |             |            |            |          |             |            |          |             |            |          |             |             |          |             |             |
| Q_Input4                | 125,052,817                                                                                                                                                                                                                                                                                                                                                                                                                                                                                                                                                                                                                                                                                                                                                                                                                                                                                                                                                                                                                                                                                                                                                                                                                                                                                                                                                                                                                                                                                                                                                                                                                                                                                                                                                                                                                                                                                                                                                                                                                                           | 118,062,365                     |                                |                                 |             |            |            |             |             |            |             |             |            |             |             |            |              |             |            |              |            |            |             |            |            |             |             |             |          |             |            |          |             |            |          |             |             |          |             |             |             |             |            |             |            |            |             |            |            |             |            |            |              |            |            |              |             |            |             |             |             |             |            |            |          |             |            |          |             |            |          |             |             |          |             |             |
| Antibodies              | Antibodies against two active histone marks, anti-histone-H3-tri-methyl-K4 (Abcam ab8580) and anti-histone-H3-acetyl-K27 (Abcam ab4729), and two repressive histone marks, anti-histone-H3-tri-methyl-K27 (Abcam ab6002) and anti-histone-H3-di-methyl-K9 (Diagenode C15410060)                                                                                                                                                                                                                                                                                                                                                                                                                                                                                                                                                                                                                                                                                                                                                                                                                                                                                                                                                                                                                                                                                                                                                                                                                                                                                                                                                                                                                                                                                                                                                                                                                                                                                                                                                                       |                                 |                                |                                 |             |            |            |             |             |            |             |             |            |             |             |            |              |             |            |              |            |            |             |            |            |             |             |             |          |             |            |          |             |            |          |             |             |          |             |             |             |             |            |             |            |            |             |            |            |             |            |            |              |            |            |              |             |            |             |             |             |             |            |            |          |             |            |          |             |            |          |             |             |          |             |             |
| Peak calling parameters | No peak calling was used in this study                                                                                                                                                                                                                                                                                                                                                                                                                                                                                                                                                                                                                                                                                                                                                                                                                                                                                                                                                                                                                                                                                                                                                                                                                                                                                                                                                                                                                                                                                                                                                                                                                                                                                                                                                                                                                                                                                                                                                                                                                |                                 |                                |                                 |             |            |            |             |             |            |             |             |            |             |             |            |              |             |            |              |            |            |             |            |            |             |             |             |          |             |            |          |             |            |          |             |             |          |             |             |             |             |            |             |            |            |             |            |            |             |            |            |              |            |            |              |             |            |             |             |             |             |            |            |          |             |            |          |             |            |          |             |             |          |             |             |
| Data quality            | ChIP-seq reads generated from the experiment were mapped to the <i>N. benthamiana</i> (LAB and QLD) genomes. Only uniquely mapped reads after removing duplicated reads (MAPQ>40) were used for downstream analysis. The pairwise correlation (spearman correlation) between replicates (>0.80) was computed using plotCorrelation. The signal strength of ChIP samples was confirmed using plotFingerprint and ChIP enrichment over the background was visualised on IGV ( <a href="https://software.broadinstitute.org/software/igv/">https://software.broadinstitute.org/software/igv/</a> ) browser.                                                                                                                                                                                                                                                                                                                                                                                                                                                                                                                                                                                                                                                                                                                                                                                                                                                                                                                                                                                                                                                                                                                                                                                                                                                                                                                                                                                                                                              |                                 |                                |                                 |             |            |            |             |             |            |             |             |            |             |             |            |              |             |            |              |            |            |             |            |            |             |             |             |          |             |            |          |             |            |          |             |             |          |             |             |             |             |            |             |            |            |             |            |            |             |            |            |              |            |            |              |             |            |             |             |             |             |            |            |          |             |            |          |             |            |          |             |             |          |             |             |
| Software                | deepTools2 and bamCompare.<br>Ramírez, F. et al. deepTools2: a next generation web server for deep-sequencing data analysis. <i>Nucleic Acids Res.</i> 44, W160–5 (2016).                                                                                                                                                                                                                                                                                                                                                                                                                                                                                                                                                                                                                                                                                                                                                                                                                                                                                                                                                                                                                                                                                                                                                                                                                                                                                                                                                                                                                                                                                                                                                                                                                                                                                                                                                                                                                                                                             |                                 |                                |                                 |             |            |            |             |             |            |             |             |            |             |             |            |              |             |            |              |            |            |             |            |            |             |             |             |          |             |            |          |             |            |          |             |             |          |             |             |             |             |            |             |            |            |             |            |            |             |            |            |              |            |            |              |             |            |             |             |             |             |            |            |          |             |            |          |             |            |          |             |             |          |             |             |
