# Supplementary material for: A multi-omic Nicotiana benthamiana resource for fundamental research and biotechnology
Source: PubMed Central journal article supplement (PMC10505560; doi:10.1038/s41477-023-01489-8), 2023-08-10

QLD GEL

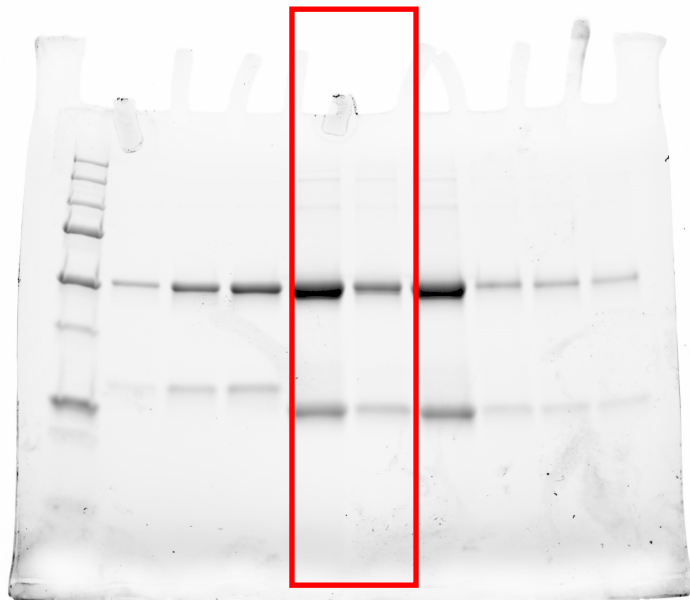

LAB GEL

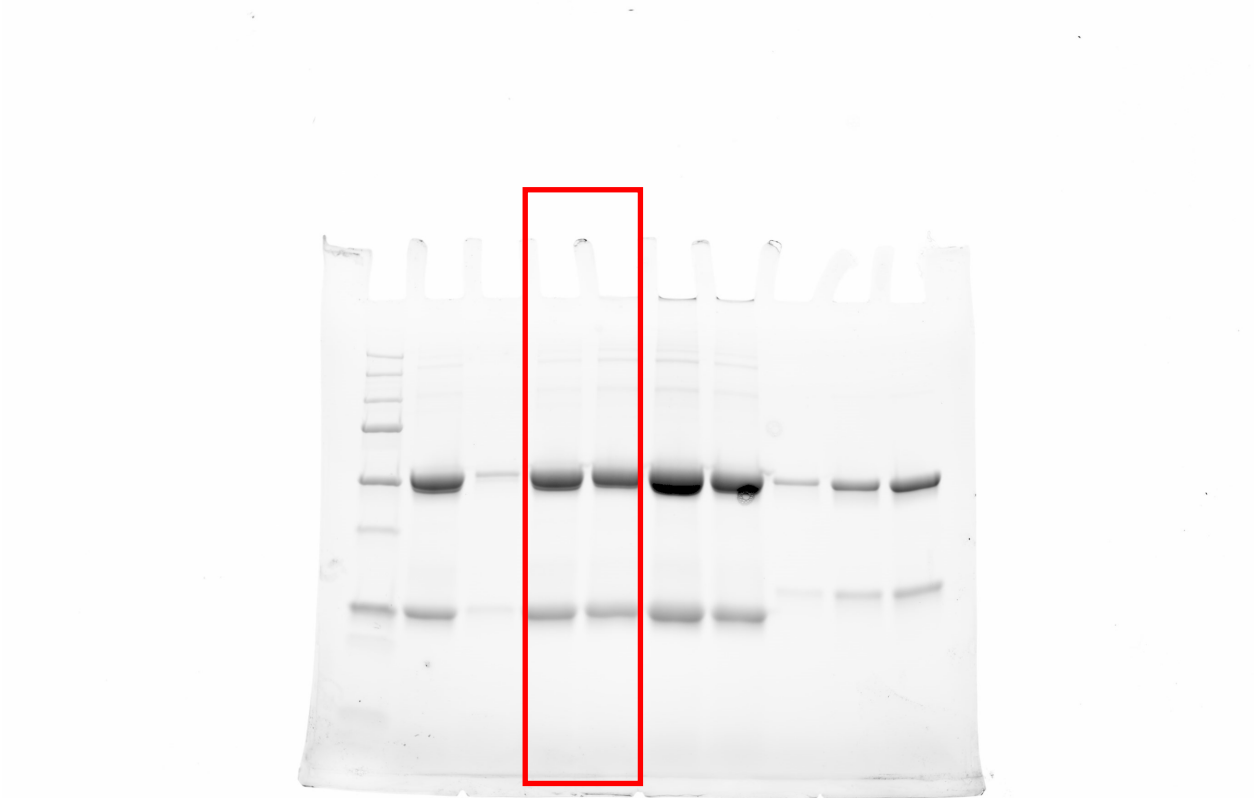

Supplement: 41477_2023_1489_MOESM4_ESM.pdf [file 41477_2023_1489_MOESM4_ESM.pdf]
